# Supplementary material
Source: publisher figshare collection journal article supplement (https://gsajournals.figshare.com/ndownloader/files/12428972)
Supplement: Supplementary file 1 [file 12428972]

**Wild T** MASPSCLWLLAVALLPGSGAARAPWRLDPAAPLPLVIWHGMGDSCCNPLSMGAIKKMVEE

**Mutant**  MASPSCLWLLAVALLPGSGAARAPWRLDPAAPLPLVIWHGMGDSCCNPLSMGAIKKMVEE

************************************************************

**Wild T** KIPGIYVLSLEIGKTLMEDVENSFFLNVNSQVTTVCQILAKDPKLHQGYNAMGF**S**QGGQF

**Mutant** KIPGIYVLSLEIGKTLMEDVENSFFLNVNSQVTTVCQILAKDPKLHQGYNAMGF**S**QGGQF

************************************************************

**Wild T** LRAVAQRCPSPPMINLISIGGQHQGVYGLPRCPGESSHICDLIRKTLNAGAYNKAIQERL

**Mutant** LRAVAQRCPSPPMINLISIGGQHQGVYGLPRCPGESSHICDLIRKTLNAGAYNKAIQERC

***********************************************************

**Wild T** VQAEYWHDPIKEDTYRNHSIFLADINQERGVNESYKRNLMALKKFVMVKFLN**D**SIVDPVD

**Mutant** L----WTPSVPRGELSHL------------------------------------------

: * : .. :

**Wild T** SEWFGFYRSGQAKETIPLQETALYTQDRLGLKEMDNAGQLVFLAVEGD**H**LQLSQEWFYAH

**Mutant** ------------------------------------------------------------

**Wild T** IIPFLE

**Mutant** ------
